# Supplementary material
Source: PubMed Central journal article supplement (PMC4405292)
Supplement: supp_2.3.e94_Figure_e-1.pdf [file supp_2.3.e94_Figure_e-1.pdf]

## Supplementary Figure 1

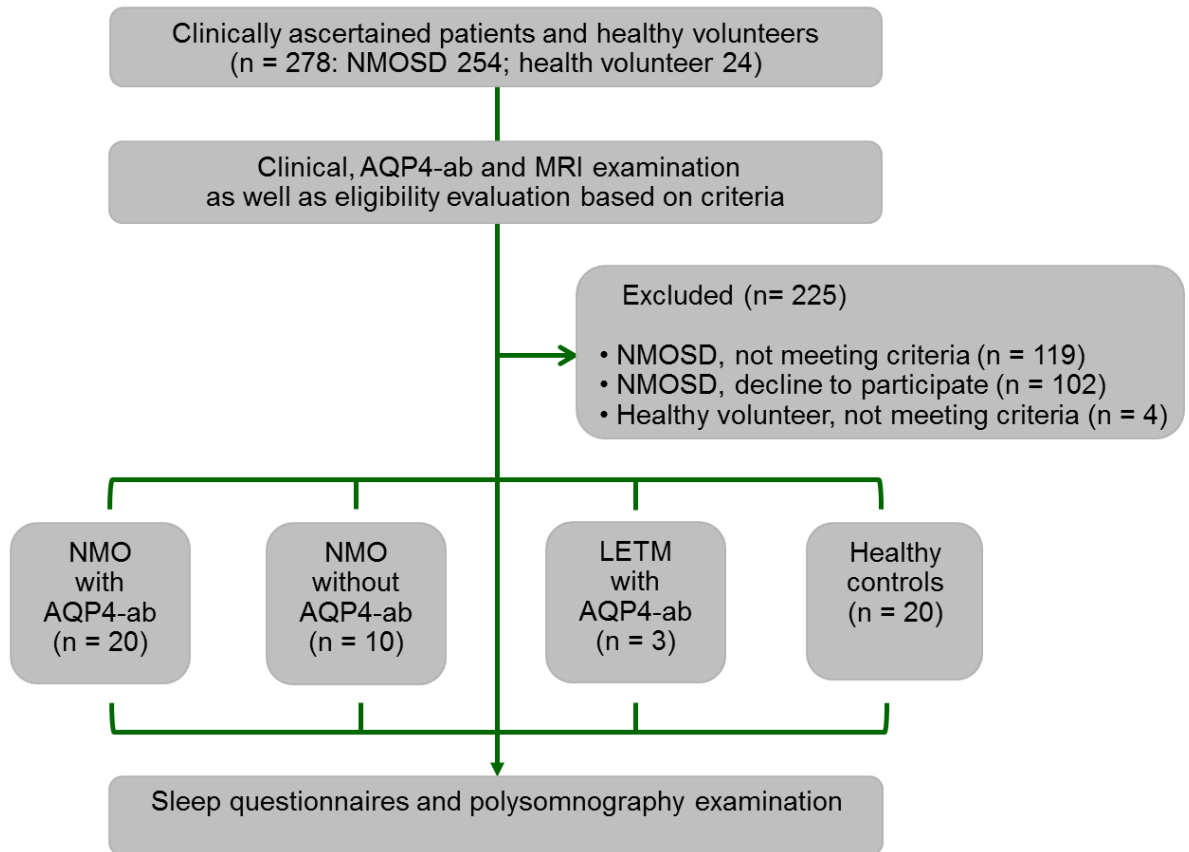

**Supplementary Figure 1. Study flow chart.**

**NMO** = Neuromyelitis optica; **NMOSD** = Neuromyelitis optica spectrum disorder; **AQP4-ab** = aquaporin 4-antibodies;

**LETM** = longitudinally extensive transverse myelitis.
