# Supplementary material
Source: PubMed Central journal article supplement (PMC4405292)
Supplement: supp_2.3.e94_Figure_e-2.pdf [file supp_2.3.e94_Figure_e-2.pdf]

## Supplementary Figure 2

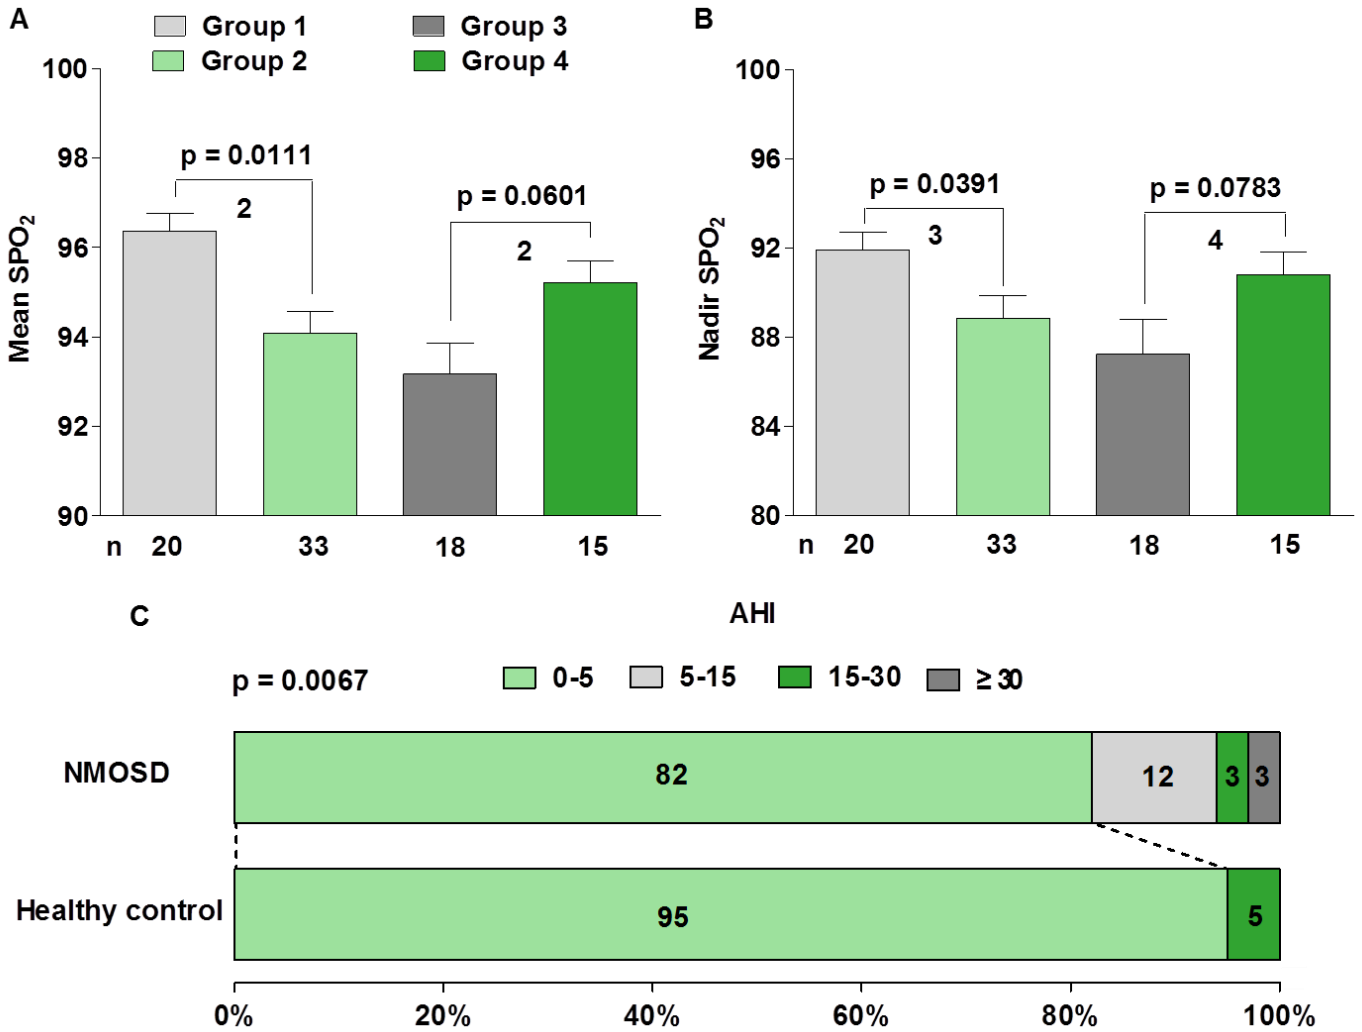

**Supplementary Figure 2: Sleep-disordered breathing accompanied by mean decreases of SpO<sub>2</sub> and nadir SpO<sub>2</sub>.**

(A, B) Mean SpO<sub>2</sub>: mean values of oxy-hemoglobin saturation, and nadir SpO<sub>2</sub>: minimal oxy-hemoglobin saturation recorded during PSG. (C) Apnea-hypopnea index (AHI): the mean numbers of apneas or hypopneas in a 1-h period. Group 1: Healthy controls, n = 20; Group 2: Patients with NMOSD, n = 33; Group 3: NMOSD without infratentorial lesions, n = 18; Group 4: NMOSD with infratentorial lesions, n = 15. A, B: Comparison of mean SpO<sub>2</sub> and nadir SpO<sub>2</sub> among the groups, C: Comparison of sleep-disordered breathing percent between NMOSD patients and healthy controls; mean SpO<sub>2</sub> and nadir SpO<sub>2</sub> were tested by one-way ANOVA accompanied by Bonferroni post-hoc test, and Chi squared tests were used to compare the percentages of sleep-disordered breathing patients. Statistical significance is defined as p < 0.05.
